# Supplementary material
Source: Springer Nature journal article supplement (https://www.springermedizin.de/resource/supplementary/12885_2012_3652_MOESM12_ESM.pdf/9463764)

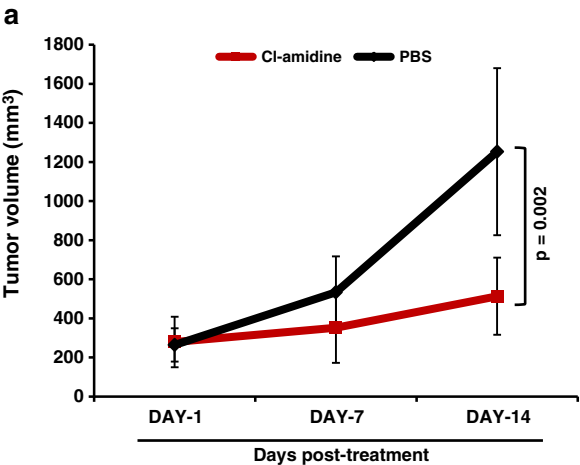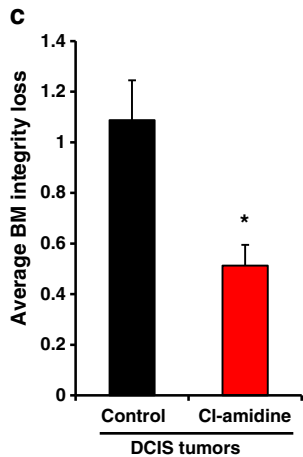

**b** MCF10DCIS xenograft tumors

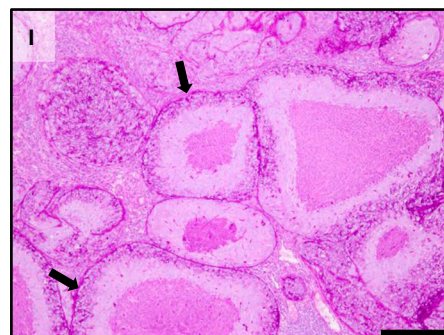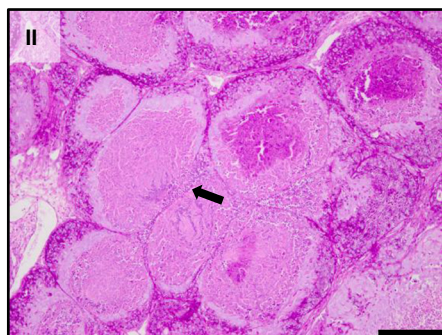

Supplement: MOESM12 [file 9463764]
